# Supplementary material for: The influence of pH, protein concentration and calcium ratio on the formation and structure of nanotubes from partially hydrolyzed bovine α-lactalbumin
Source: Royal Society of Chemistry journal article supplement (doi:10.1039/c9sm00127a), 2019-01-01
Supplement: c9sm00127a1.pdf [file c9sm00127a1.pdf]

**Electronic Supplementary Information:**

Supplementary table 1. The extracted values based on log-normal distribution from SAXS fitting equation 4.

| Sample name* | Mu  | Sigma | Mean (R in Å) | Coefficient of variation (%) |
|--------------|-----|-------|---------------|------------------------------|
| 30_2.4_pH7.5 | 2.9 | 0.6   | 20.8          | 21.0                         |
| 30_2.4_pH7.0 | 2.3 | 0.7   | 12.3          | 30.2                         |
| 30_2.4_pH6.5 | 2.2 | 0.8   | 12.5          | 33.2                         |
| 30_2.4_pH5.5 | 2.6 | 0.6   | 15.8          | 21.4                         |
| 30_2.4_pH4.0 | 2.5 | 0.6   | 14.3          | 25.1                         |
| 30_5.4_pH7.5 | 1.8 | 1     | 10.6          | 55.6                         |
| 30_5.4_pH7.0 | 1.8 | 0.9   | 9.4           | 49.4                         |
| 30_5.4_pH6.5 | 2.8 | 0.5   | 17.9          | 18.0                         |
| 30_5.4_pH5.5 | 2.2 | 0.8   | 12.0          | 34.2                         |
| 30_5.4_pH4.0 | 2.1 | 0.8   | 11.3          | 38.3                         |
| 10_2.4_pH7.5 | 3.1 | 0.6   | 25.4          | 18.5                         |
| 10_2.4_pH7.0 | 3.0 | 0.5   | 22.3          | 15.6                         |
| 10_2.4_pH6.5 | 2.6 | 0.7   | 17.9          | 28.1                         |
| 10_2.4_pH5.5 | 2.1 | 1.1   | 13.9          | 50.7                         |
| 10_2.4_pH4.0 | 2.4 | 0.9   | 17.3          | 37.7                         |
| 10_5.4_pH7.5 | 2.8 | 0.7   | 21.1          | 24.5                         |
| 10_5.4_pH7.0 | 2.9 | 0.5   | 20.4          | 18.6                         |
| 10_5.4_pH6.5 | 2.0 | 1     | 12.4          | 52.1                         |
| 10_5.4_pH5.5 | 2.0 | 1.1   | 12.7          | 54.2                         |
| 10_5.4_pH4.0 | 2.0 | 1.2   | 16.7          | 60.7                         |

\*The first number is the  $\alpha$ -La concentration (30 or 10 g l<sup>-1</sup>), the second number is the calcium ratio (R=2.4 or 5.4, R is the molar ratio between calcium and  $\alpha$ -La), and the third is the pH value.

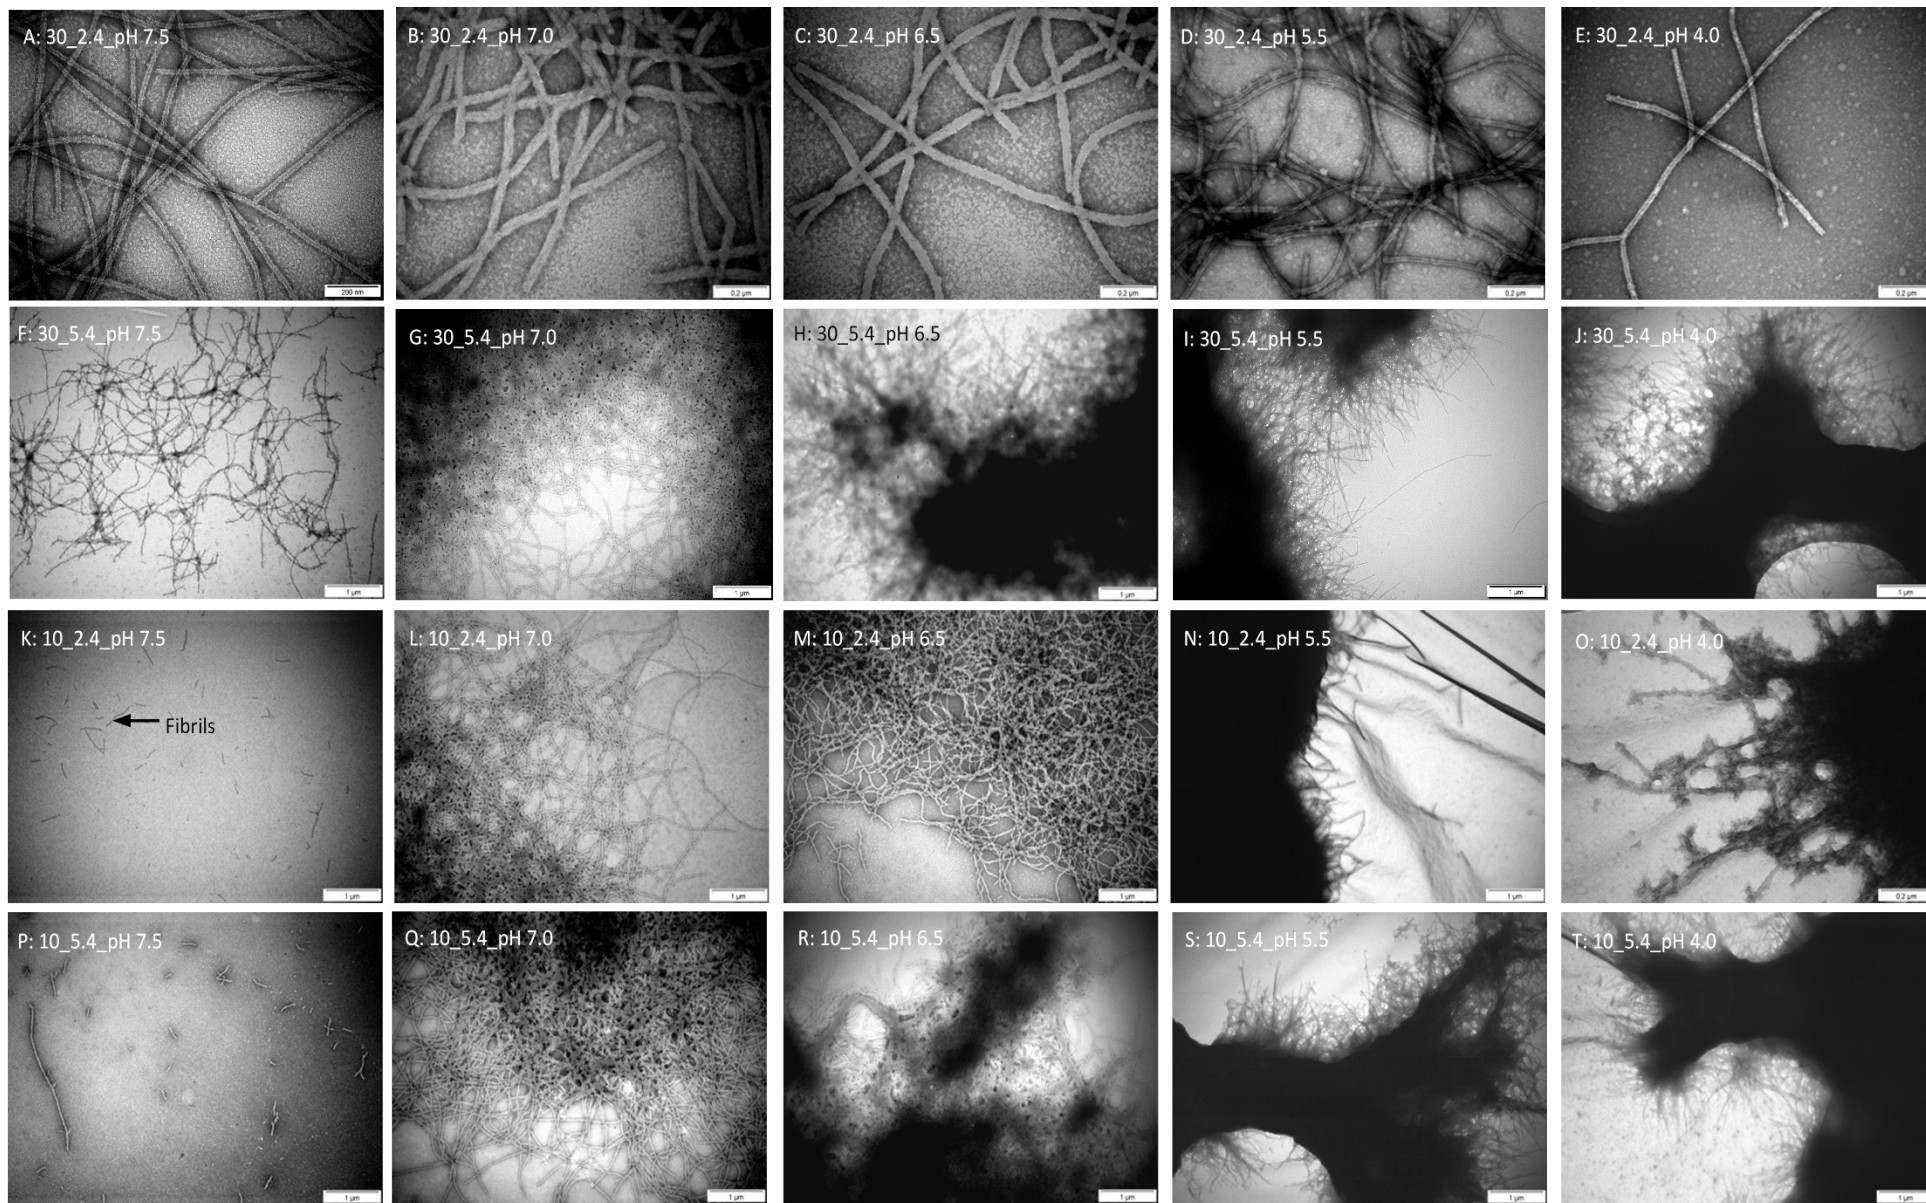

Supplementary Fig. 1. Negative stained transmission electron microscopy images of mapping of the formation of nanotubes and gels upon hydrolysis of  $\alpha$ -La with *Bacillus licheniformis* at different levels of  $\alpha$ -La concentration, calcium ratio and pH (A-T). The first number indicates the  $\alpha$ -La concentration (30 or 10 g l<sup>-1</sup>), the second number indicates the calcium ratio, R= 2.4 or 5.4, followed by the pH value.
